# Supplementary material
Source: Springer Nature journal article supplement (https://www.springermedizin.de/resource/supplementary/12913_2011_2514_MOESM3_ESM.pdf/9530822)
Supplement: MOESM3 [file 9530822]

**Figure 3: TB drug side effects**

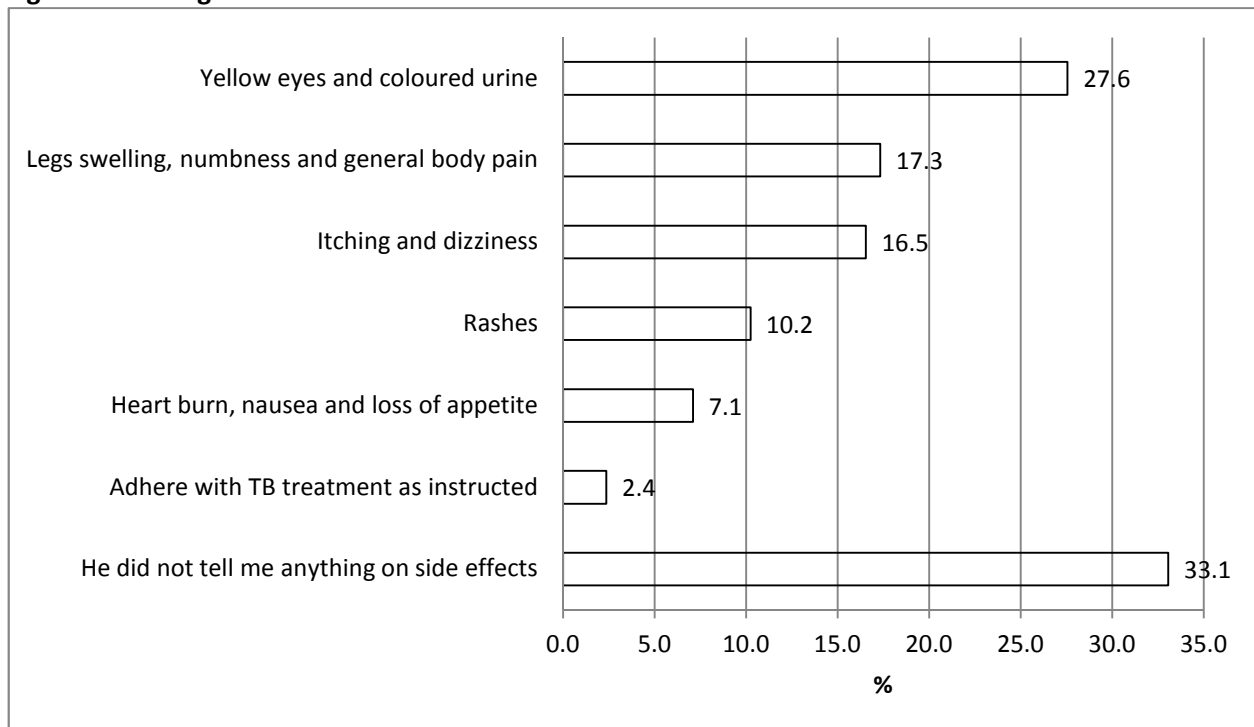

N = 127 (All TB patients in the study)

Post coding categories, multiple responses possible per respondent
